# Supplementary material for: Comparison of three elements (In, Sn, and Sb) in the same period as catalysts in the ring-opening polymerization of l-lactide: from amorphous to semicrystalline polyesters
Source: Royal Society of Chemistry journal article supplement (doi:10.1039/d4ra06783e), 2024-01-01
Supplement: d4ra06783e1.pdf [file d4ra06783e1.pdf]

Supplementary Information

**Comparison of three different elements in the same period (In, Sn, and Sb) as catalysts in the ring-opening polymerization of L-lactide: from amorphous to semicrystalline polyester**

Oscar F. González-Belman, J. Oscar C. Jiménez-Halla, Gerardo González, and José E. Báez <sup>\*a</sup>

Department of Chemistry, Division of Natural and Exact Sciences, University of Guanajuato (UG), Noria Alta S/N 36050, Guanajuato, Mexico.

To whom correspondence should be addressed: José E. Báez, e-mail: [jebaez@ugto.mx](mailto:jebaez@ugto.mx)

## Table of Contents

| Figures                                                                                                                                                                                                                                                                                                                                   | Page |
|-------------------------------------------------------------------------------------------------------------------------------------------------------------------------------------------------------------------------------------------------------------------------------------------------------------------------------------------|------|
| <b>Figure S1.</b> $^{13}\text{C}$ NMR spectrum of the oligomers obtained from ROP of L-lactide catalyzed by tin (III) acetate (Entry 10, Table 4) in presence of 1-octanol as initiator.                                                                                                                                                  | 4    |
| <b>Figure S2.</b> $^{13}\text{C}$ NMR spectrum of the oligomers obtained from ROP of L-lactide catalyzed by tin (III) acetate (Entry 10, Table 4) in presence of 1-octanol as initiator.                                                                                                                                                  | 4    |
| <b>Figure S3.</b> Thermograms (DSC) of oligomers obtained from ROP of L-LA initiated by $\text{Sn}(\text{OAc})_2$ and 1-octanol: A) Purified oligomers and B) Reaction crude.                                                                                                                                                             | 5    |
| <b>Figure S4.</b> $^{13}\text{C}$ NMR spectrum of the carbonyl region of the oligomers obtained from the ROP of L-LA catalyzed by antimony(III) acetate (Entry 8, Table 3) in presence of water ( $\text{H}_2\text{O}$ ) as initiator.                                                                                                    | 5    |
| <b>Figure S5.</b> $^1\text{H}$ NMR spectrum of methine region of oligomers obtained from ROP L-LA catalyzed by antimony(III) acetate (Entry 8, Table 3) in presence of water ( $\text{H}_2\text{O}$ ) as initiator: A) After the derivatization reaction and B) before the derivatization reaction.                                       | 6    |
| <b>Figure S6.</b> Thermograms (DSC) of oligomers obtained from ROP of L-LA using water ( $\text{H}_2\text{O}$ ) as initiator and tin(II) acetate (A, Entry 6, Table 3) and antimony(III) acetate (B, Entry 8, Table 3) as catalysts.                                                                                                      | 6    |
| <b>Figure S7.</b> $^1\text{H}$ NMR spectrum of the oligomers obtained from ROP of L-lactide catalyzed by tin(II) acetate in presence of ethylene glycol (A, Entry 13, Table 4) and 1,8-octanediol (B, Entry 14, Table 4) as initiators.                                                                                                   | 7    |
| <b>Figure S8.</b> $^{13}\text{C}$ NMR spectrum of methine $[-\text{OOC}-\text{CH}(\text{CH}_3)-\text{O}-]$ region of the oligomers obtained from ROP of L-LA catalyzed by tin(II) acetate in presence of 1,8-octanediol (A) and ethylene glycol (B) as initiators (Solvent: $\text{CDCl}_3$ , i = isotactic diad, s = syndiotactic diad). | 7    |
| <b>Figure S9.</b> Thermal effect in the ROP of L-lactide initiated by tin(II) acetate and 1-octanol.                                                                                                                                                                                                                                      | 8    |
| <b>Figure S10.</b> Thermal effect in the ROP of L-lactide initiated by tin(II) acetate and 1-octanol.                                                                                                                                                                                                                                     | 8    |
| <b>Figure S11.</b> Thermograms (DSC) of oligomers obtained from ROP of L-LA using water ( $\text{H}_2\text{O}$ ) as initiator and antimony(III) acetate (B, Entry 8, Table 3) as catalyst: after the reaction time finishes (B) and one year later (A).                                                                                   | 9    |

---

**Tables**

**Table S1.** Optimized cartesian coordinates (xyz) for all species in **9** the energy profile of Figure 9. Coordinates are given in Å.

---

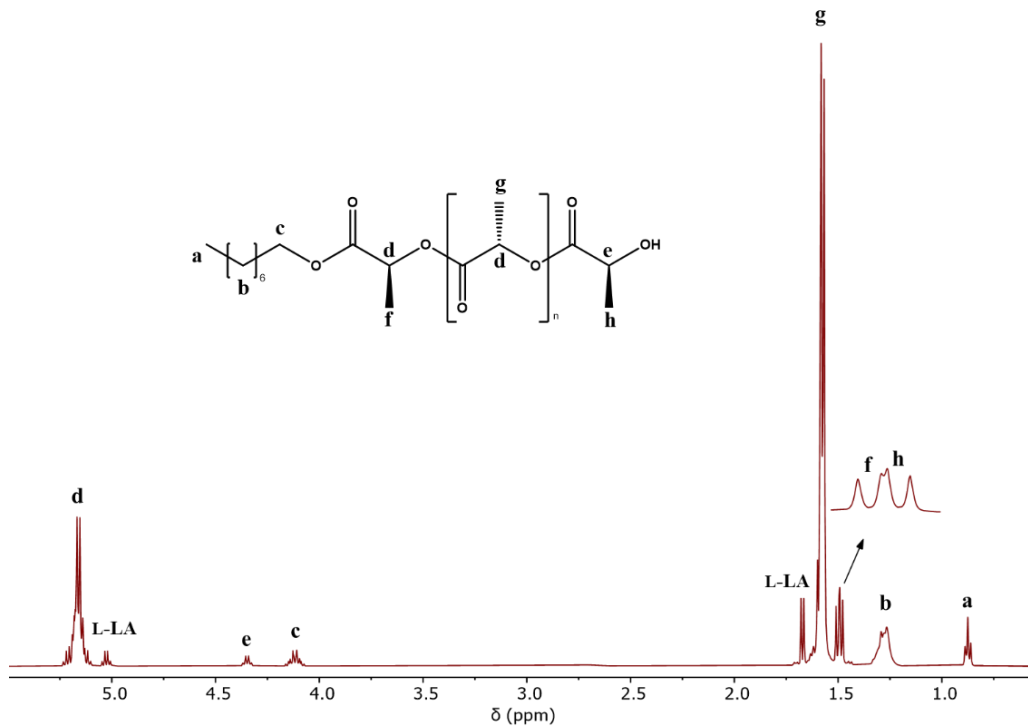

**Figure S1.**  $^1\text{H}$  NMR spectrum of the oligomers obtained from ROP of L-lactide catalyzed by tin(III) acetate (Entry 10, Table 4) in presence of 1-octanol as initiator.

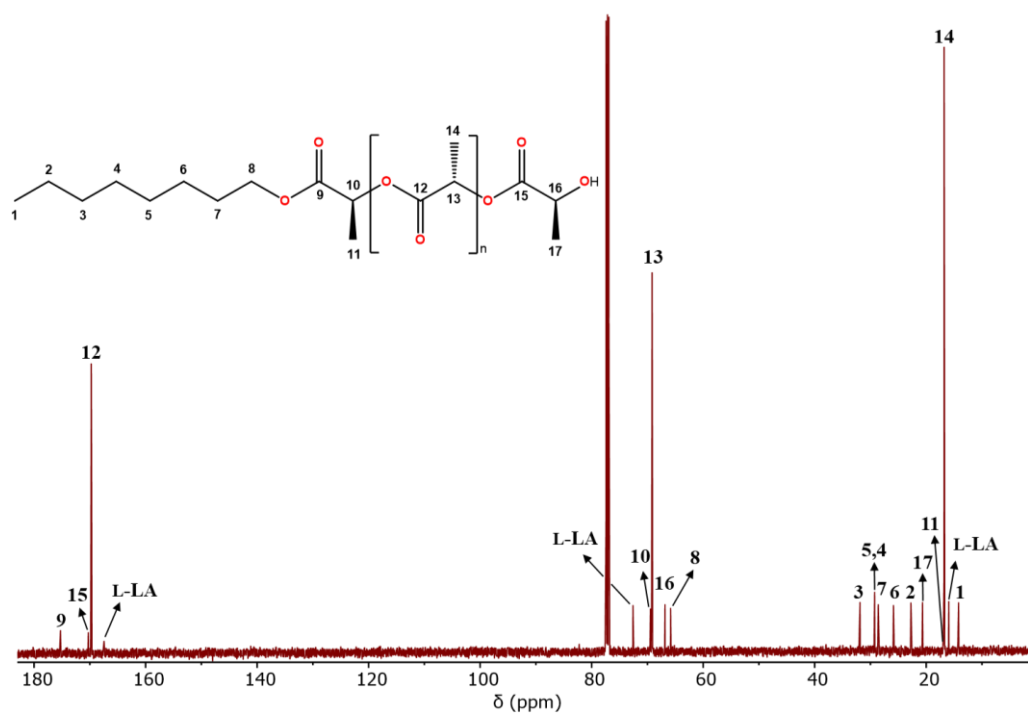

**Figure S2.**  $^{13}\text{C}$  NMR spectrum of the oligomers obtained from ROP of L-lactide catalyzed by tin (III) acetate (Entry 10, Table 4) in presence of 1-octanol as initiator.

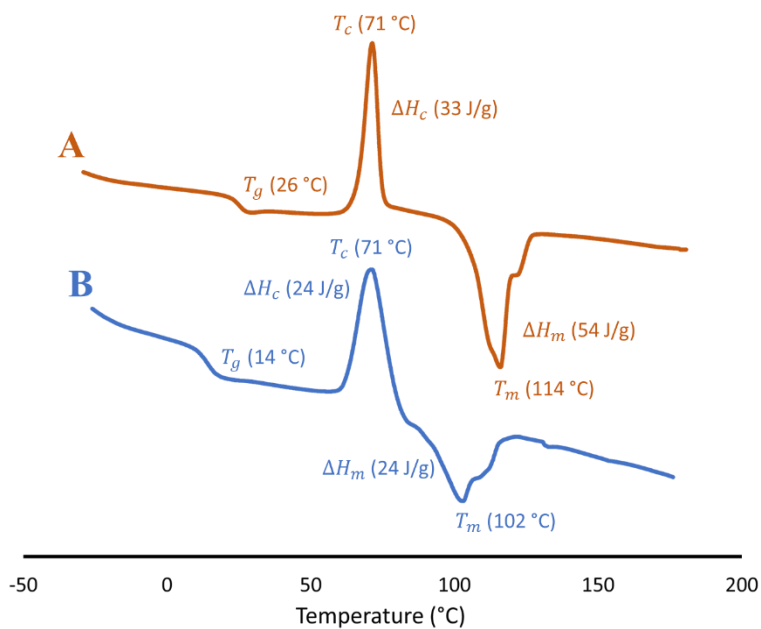

**Figure S3.** Thermograms (DSC) of oligomers obtained from ROP of L-LA initiated by  $\text{Sn}(\text{OAc})_2$  and 1-octanol: A) Purified oligomers and B) Reaction crude.

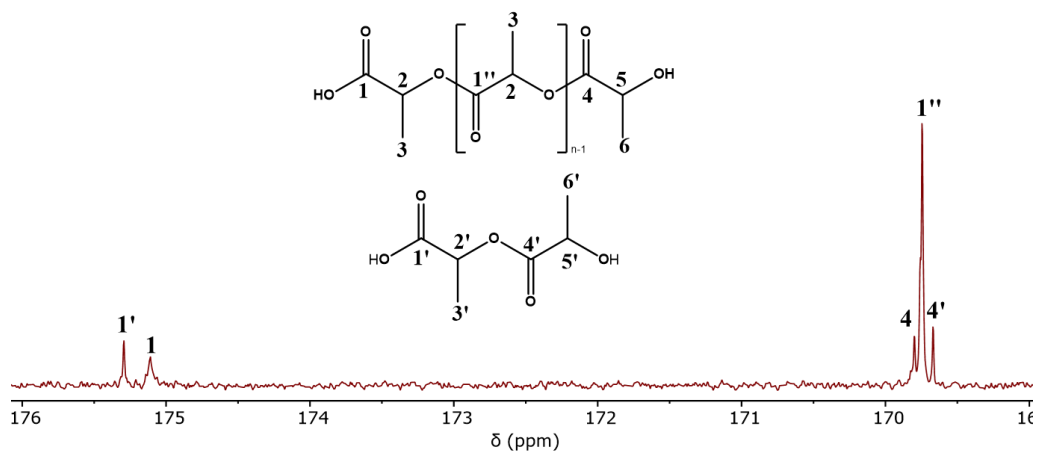

**Figure S4.**  $^{13}\text{C}$  NMR spectrum of the carbonyl region of the oligomers obtained from the ROP of L-LA catalyzed by antimony(III) acetate (Entry 8, Table 3) in presence of water ( $\text{H}_2\text{O}$ ) as initiator.

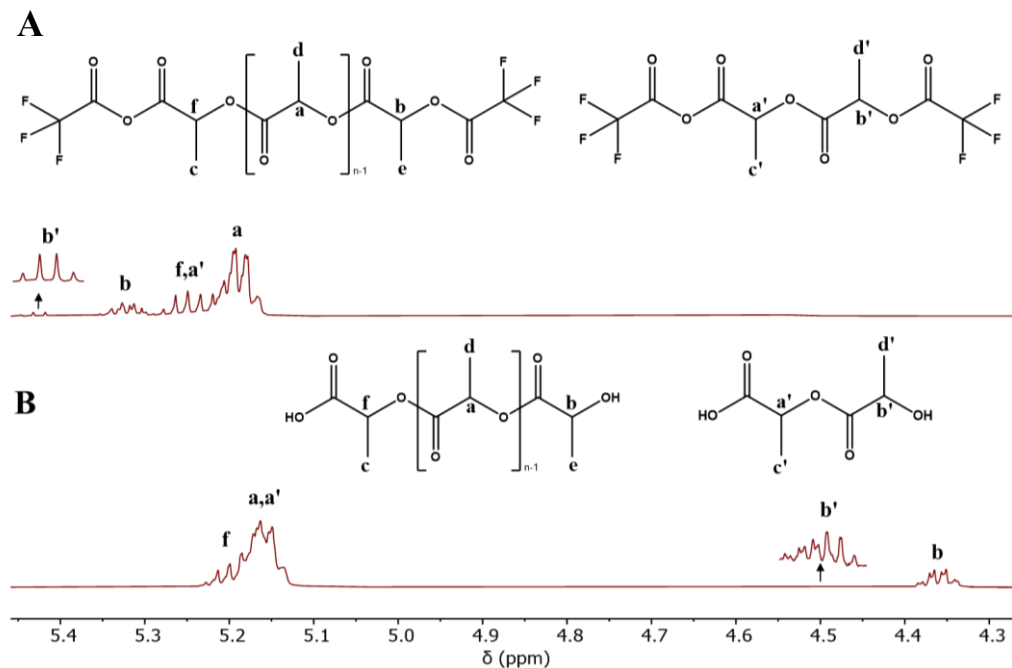

**Figure S5.**  $^1\text{H}$  NMR spectrum of methine region of oligomers obtained from ROP L-LA catalyzed by antimony(III) acetate (Entry 8, Table 3) in presence of water ( $\text{H}_2\text{O}$ ) as initiator: A) After the derivatization reaction and B) before the derivatization reaction.

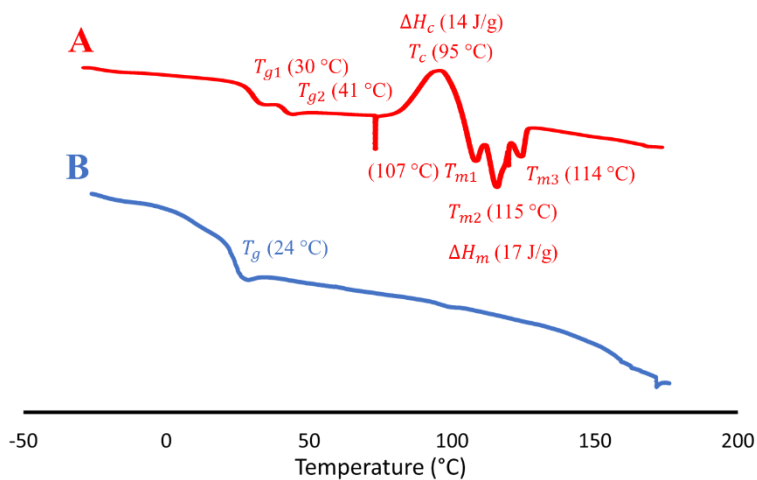

**Figure S6.** Thermograms (DSC) of oligomers obtained from ROP of L-LA using water ( $\text{H}_2\text{O}$ ) as initiator and tin(II) acetate (A, Entry 6, Table 3) and antimony(III) acetate (B, Entry 8, Table 3) as catalysts.

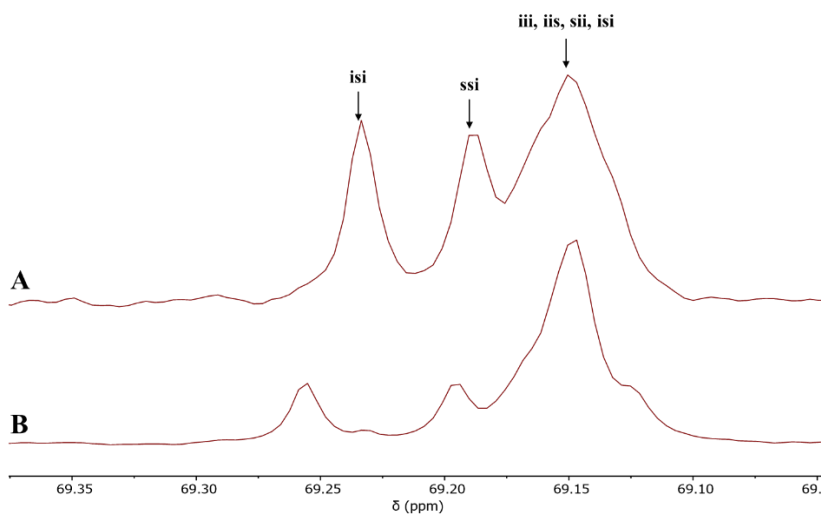

**Figure S7.**  $^{13}\text{C}$  NMR spectrum of methine  $[-\text{OOC}-\text{CH}(\text{CH}_3)-\text{O}-]$  region of the oligomers obtained from ROP of L-LA catalyzed by indium(II) (A) acetate and antimony(III) acetate (B) in presence of water ( $\text{H}_2\text{O}$ ) as initiator (Solvent:  $\text{CDCl}_3$ , i = isotactic tetrad, s = syndiotactic tetrad).

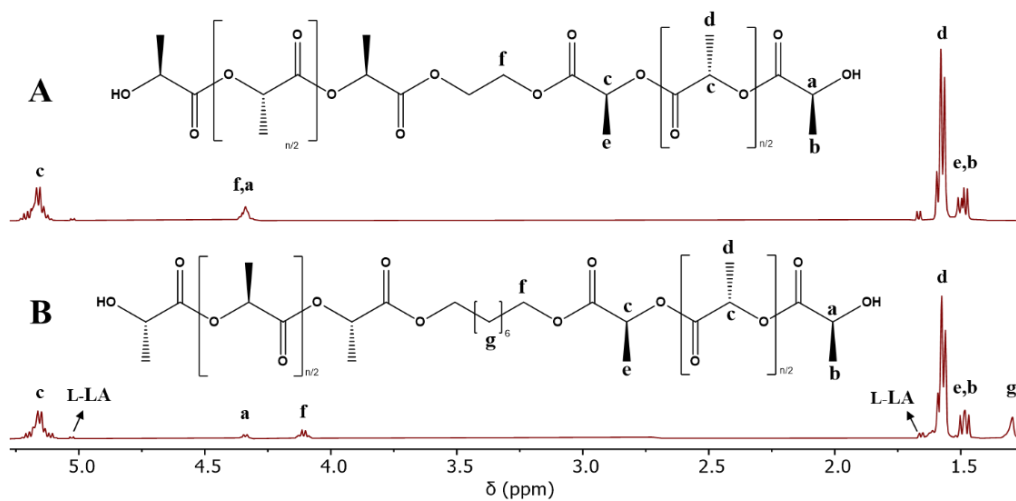

**Figure S8.**  $^1\text{H}$  NMR spectrum of the oligomers obtained from ROP of L-lactide catalyzed by tin(II) acetate in presence of ethylene glycol (A, Entry 13, Table 4) and 1,8-octanediol (B, Entry 14, Table 4) as initiators.

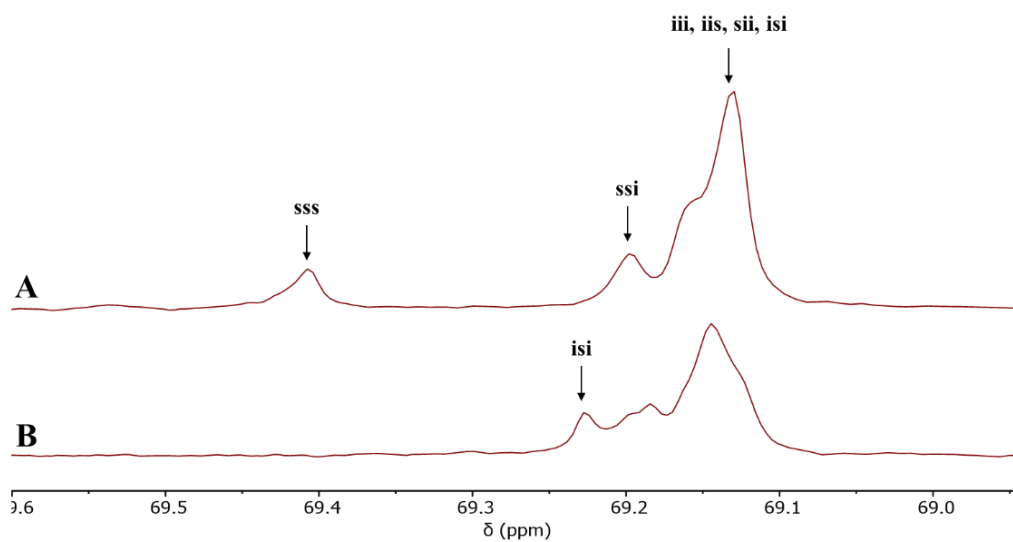

**Figure S9.**  $^{13}\text{C}$  NMR spectrum of methine  $[-\text{OOC}-\text{CH}(\text{CH}_3)-\text{O}-]$  region of the oligomers obtained from ROP of L-LA catalyzed by tin(II) acetate in presence of 1,8-octanediol (A) and ethylene glycol (B) as initiators (Solvent:  $\text{CDCl}_3$ , i = isotactic tetrad, s = syndiotactic tetrad).

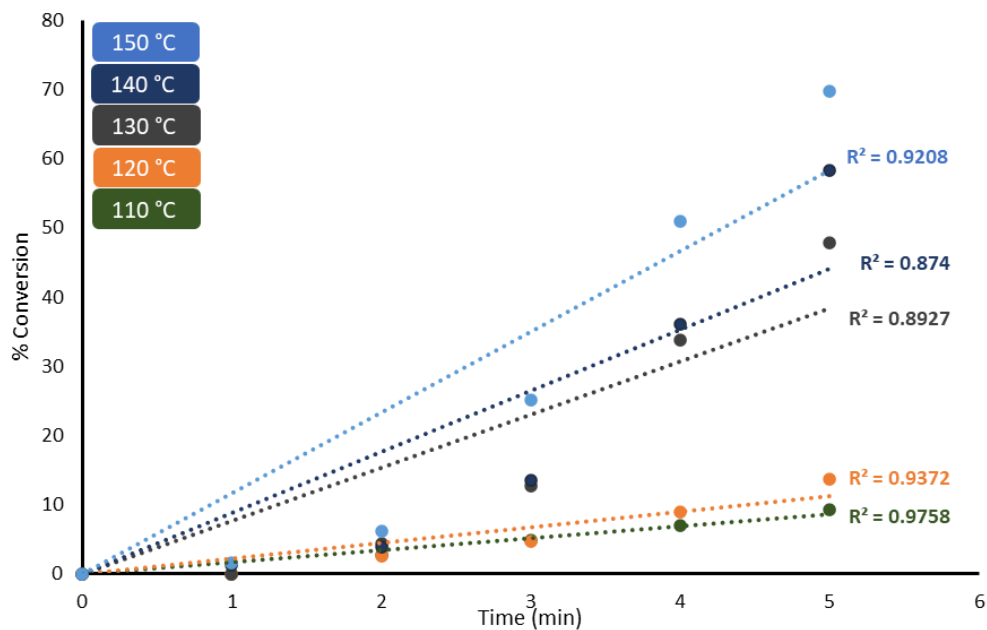

**Figure S10.** Thermal effect in the ROP of L-lactide initiated by tin(II) acetate and 1-octanol.



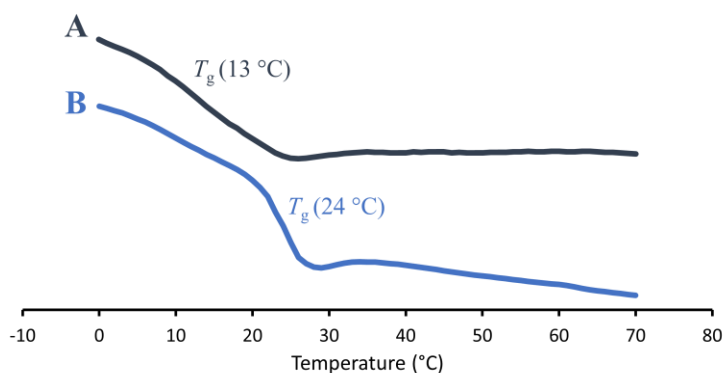

**Figure S11.** Thermograms (DSC) of oligomers obtained from ROP of L-LA using water (H<sub>2</sub>O) as initiator and antimony(III) acetate (B, Entry 8, Table 3) as catalyst, respectively: after the reaction time finishes (B) and one year later (A).

**Table S1.** Optimized cartesian coordinates (xyz) for all species in the energy profile of Figure 9. Coordinates are given in Å.

| Add<br>E(scf)= -900.931340804              |              |              |              | TS <sub>1</sub><br>E(scf)= -900.913850235<br>v <sub>min</sub> = -726.4915 |              |              |              |
|--------------------------------------------|--------------|--------------|--------------|---------------------------------------------------------------------------|--------------|--------------|--------------|
| 50                                         | 0.707313000  | 0.083547000  | -1.072647000 | 50                                                                        | 0.207299000  | -0.181284000 | -1.032709000 |
| 8                                          | 1.716436000  | 1.421843000  | 0.519895000  | 8                                                                         | -1.750995000 | -1.076018000 | -0.024134000 |
| 8                                          | 0.166398000  | -1.179090000 | 0.637000000  | 8                                                                         | 1.716568000  | 1.527489000  | -0.095116000 |
| 6                                          | 0.665748000  | 2.091699000  | 0.702244000  | 6                                                                         | -2.895869000 | -0.416677000 | 0.181225000  |
| 6                                          | 1.284348000  | -1.798257000 | 0.811943000  | 6                                                                         | 0.689724000  | 2.109690000  | 0.326275000  |
| 6                                          | 1.364872000  | -2.750084000 | 1.977289000  | 6                                                                         | 0.782716000  | 3.362872000  | 1.151902000  |
| 8                                          | 2.236428000  | -1.600616000 | 0.050855000  | 8                                                                         | -0.460723000 | 1.630534000  | 0.074993000  |
| 6                                          | 0.625734000  | 3.182954000  | 1.736098000  | 6                                                                         | -3.286563000 | -0.318932000 | 1.640162000  |
| 8                                          | -0.369490000 | 1.823271000  | 0.028789000  | 8                                                                         | -3.529795000 | 0.054214000  | -0.724113000 |
| 1                                          | 0.203853000  | 2.761744000  | 2.664955000  | 1                                                                         | -3.339253000 | -1.322409000 | 2.095205000  |
| 1                                          | -0.034707000 | 3.997830000  | 1.404511000  | 1                                                                         | -4.257070000 | 0.187255000  | 1.738744000  |
| 1                                          | 1.638341000  | 3.555831000  | 1.945873000  | 1                                                                         | -2.512748000 | 0.256424000  | 2.177616000  |
| 1                                          | 2.332875000  | -3.269650000 | 1.983191000  | 1                                                                         | 0.602240000  | 3.099323000  | 2.208251000  |
| 1                                          | 0.540203000  | -3.479338000 | 1.923572000  | 1                                                                         | -0.000431000 | 4.073925000  | 0.848159000  |
| 1                                          | 1.242118000  | -2.181754000 | 2.914294000  | 1                                                                         | 1.779392000  | 3.816557000  | 1.059125000  |
| 8                                          | -1.852133000 | -0.066370000 | -1.158727000 | 8                                                                         | 0.297240000  | -1.027233000 | 1.006453000  |
| 6                                          | -2.645019000 | -1.123914000 | -0.658905000 | 6                                                                         | 1.220791000  | -2.035384000 | 1.312033000  |
| 1                                          | -2.077118000 | -2.062542000 | -0.758952000 | 1                                                                         | 1.079610000  | -2.925590000 | 0.665070000  |
| 1                                          | -3.566630000 | -1.211021000 | -1.270463000 | 1                                                                         | 1.093010000  | -2.358067000 | 2.361515000  |
| 1                                          | -2.071483000 | 0.736127000  | -0.643546000 | 1                                                                         | -0.872564000 | -1.225552000 | 0.799796000  |
| 6                                          | -2.995650000 | -0.862701000 | 0.797569000  | 6                                                                         | 2.621712000  | -1.476205000 | 1.117993000  |
| 1                                          | -3.672867000 | -1.652345000 | 1.178687000  | 1                                                                         | 2.790112000  | -0.671723000 | 1.855586000  |
| 1                                          | -2.070179000 | -0.873216000 | 1.391542000  | 1                                                                         | 3.373346000  | -2.267756000 | 1.287778000  |
| 8                                          | -3.547932000 | 0.428285000  | 0.942274000  | 8                                                                         | 2.754626000  | -0.976039000 | -0.198456000 |
| 1                                          | -4.427904000 | 0.444202000  | 0.540596000  | 1                                                                         | 2.888995000  | -0.013957000 | -0.155963000 |
| Int <sub>1</sub><br>E(scf)= -900.923375124 |              |              |              | Int <sub>2</sub><br>E(scf)= -672.075170019                                |              |              |              |
| 50                                         | 0.526518000  | -0.259586000 | -1.011223000 | 50                                                                        | 0.210312000  | -0.966887000 | -0.212646000 |
| 8                                          | -2.026124000 | -1.343637000 | -0.256448000 | 8                                                                         | -1.168909000 | 0.804618000  | -0.791115000 |
| 8                                          | 1.452157000  | 1.678610000  | -0.045599000 | 6                                                                         | -2.026973000 | 0.475800000  | 0.085355000  |

|   |              |              |              |   |              |              |              |
|---|--------------|--------------|--------------|---|--------------|--------------|--------------|
| 6 | -3.055965000 | -0.572875000 | 0.156970000  | 6 | -3.274296000 | 1.301791000  | 0.245062000  |
| 6 | 0.297185000  | 2.132517000  | 0.191216000  | 8 | -1.823589000 | -0.527339000 | 0.811680000  |
| 6 | 0.121148000  | 3.445602000  | 0.901968000  | 1 | -2.996398000 | 2.291022000  | 0.646076000  |
| 8 | -0.716631000 | 1.463223000  | -0.148710000 | 1 | -3.978107000 | 0.813562000  | 0.933046000  |
| 6 | -2.983414000 | -0.168672000 | 1.613666000  | 1 | -3.743195000 | 1.462194000  | -0.738709000 |
| 8 | -3.933636000 | -0.270280000 | -0.596960000 | 8 | 1.104418000  | 0.011207000  | 1.329341000  |
| 1 | -3.011162000 | -1.063507000 | 2.259946000  | 6 | 2.213752000  | 0.792678000  | 1.055207000  |
| 1 | -3.833168000 | 0.484305000  | 1.855682000  | 1 | 3.111022000  | 0.187496000  | 0.790333000  |
| 1 | -2.034256000 | 0.359420000  | 1.800599000  | 1 | 2.488651000  | 1.390055000  | 1.947099000  |
| 1 | -0.047590000 | 3.240854000  | 1.973532000  | 6 | 1.925890000  | 1.752242000  | -0.093293000 |
| 1 | -0.766092000 | 3.968637000  | 0.515631000  | 1 | 1.118365000  | 2.443206000  | 0.204247000  |
| 1 | 1.021255000  | 4.068230000  | 0.799482000  | 1 | 2.822737000  | 2.333555000  | -0.372328000 |
| 8 | 0.247783000  | -1.154160000 | 0.856530000  | 8 | 1.498956000  | 0.971307000  | -1.212000000 |
| 6 | 1.296099000  | -1.846095000 | 1.452228000  | 1 | 0.744083000  | 1.409824000  | -1.634711000 |
| 1 | 1.499703000  | -2.813455000 | 0.943812000  |   |              |              |              |
| 1 | 1.046838000  | -2.080011000 | 2.505115000  |   |              |              |              |
| 1 | -1.340227000 | -1.480136000 | 0.451887000  |   |              |              |              |
| 6 | 2.561129000  | -1.003239000 | 1.431544000  |   |              |              |              |
| 1 | 2.397106000  | -0.086906000 | 2.024817000  |   |              |              |              |
| 1 | 3.420237000  | -1.559563000 | 1.847145000  |   |              |              |              |
| 8 | 2.822624000  | -0.654387000 | 0.073495000  |   |              |              |              |
| 1 | 3.134999000  | 0.263052000  | 0.039498000  |   |              |              |              |

Int<sub>3</sub>

E(scf)= -1205.89118786

|    |              |              |              |
|----|--------------|--------------|--------------|
| 8  | -2.420869000 | 0.137993000  | -1.218917000 |
| 6  | -1.550626000 | -0.806418000 | -0.897084000 |
| 6  | -1.723080000 | -1.443129000 | 0.473527000  |
| 8  | -0.671535000 | -1.122294000 | -1.663305000 |
| 8  | -3.080334000 | -1.374541000 | 0.921141000  |
| 6  | -3.132955000 | 0.780635000  | -0.155162000 |
| 6  | -3.795458000 | -0.260461000 | 0.739216000  |
| 8  | -4.867258000 | -0.115727000 | 1.249486000  |
| 6  | -4.121088000 | 1.748852000  | -0.763060000 |
| 1  | -2.380148000 | 1.322899000  | 0.445951000  |
| 1  | -4.855588000 | 1.212685000  | -1.384627000 |
| 1  | -3.584673000 | 2.480591000  | -1.386943000 |
| 1  | -4.661333000 | 2.274721000  | 0.038042000  |
| 6  | -1.295458000 | -2.895208000 | 0.495953000  |
| 1  | -1.077345000 | -0.862580000 | 1.158396000  |
| 1  | -1.880494000 | -3.487620000 | -0.225799000 |
| 1  | -1.456612000 | -3.301765000 | 1.506562000  |
| 1  | -0.226007000 | -2.947076000 | 0.250508000  |
| 50 | 1.675737000  | 0.057753000  | -0.986026000 |
| 8  | 2.017652000  | 1.942271000  | 0.475986000  |
| 6  | 0.779949000  | 2.061806000  | 0.644832000  |
| 6  | 0.224257000  | 3.099053000  | 1.585529000  |
| 8  | -0.021207000 | 1.293609000  | 0.035963000  |
| 1  | -0.166517000 | 2.590241000  | 2.483395000  |
| 1  | -0.616668000 | 3.627119000  | 1.108787000  |
| 1  | 1.002688000  | 3.814098000  | 1.886033000  |
| 8  | 1.426036000  | -1.191208000 | 0.627181000  |
| 6  | 2.540627000  | -1.764638000 | 1.220404000  |
| 1  | 3.021024000  | -2.528244000 | 0.568205000  |
| 1  | 2.246777000  | -2.285622000 | 2.153205000  |
| 6  | 3.577929000  | -0.705672000 | 1.567083000  |
| 1  | 3.148885000  | -0.005394000 | 2.305148000  |
| 1  | 4.491338000  | -1.161965000 | 1.989702000  |
| 8  | 3.902128000  | -0.003452000 | 0.370110000  |

TS<sub>2</sub>

E(scf)= -1205.87908918

v<sub>min</sub>= -209.2538

|    |              |              |              |
|----|--------------|--------------|--------------|
| 8  | -1.034666000 | 0.585767000  | -0.114866000 |
| 6  | -0.948914000 | -0.731523000 | -0.414216000 |
| 6  | -2.249479000 | -1.498705000 | -0.146942000 |
| 8  | -0.183380000 | -1.031833000 | -1.363726000 |
| 8  | -3.360352000 | -0.683060000 | -0.536960000 |
| 6  | -2.151620000 | 1.044273000  | 0.637125000  |
| 6  | -3.435845000 | 0.560865000  | -0.042484000 |
| 8  | -4.425926000 | 1.220279000  | -0.151380000 |
| 6  | -2.063350000 | 2.551897000  | 0.725509000  |
| 1  | -2.116333000 | 0.605950000  | 1.654243000  |
| 1  | -2.162763000 | 2.998212000  | -0.276364000 |
| 1  | -1.087356000 | 2.840795000  | 1.147995000  |
| 1  | -2.874414000 | 2.940197000  | 1.359303000  |
| 6  | -2.318223000 | -2.801064000 | -0.905152000 |
| 1  | -2.330790000 | -1.685335000 | 0.937035000  |
| 1  | -2.213658000 | -2.617735000 | -1.985138000 |
| 1  | -3.280706000 | -3.298101000 | -0.707087000 |
| 1  | -1.495402000 | -3.454230000 | -0.577279000 |
| 50 | 1.878603000  | -0.988844000 | -0.406505000 |
| 8  | 1.719623000  | 2.482808000  | 0.541082000  |
| 6  | 1.597639000  | 2.193734000  | -0.658637000 |
| 6  | 1.110333000  | 3.223762000  | -1.646082000 |
| 8  | 1.854235000  | 1.038938000  | -1.153139000 |
| 1  | 0.120815000  | 2.902367000  | -2.013564000 |
| 1  | 1.786246000  | 3.260943000  | -2.515385000 |
| 1  | 1.032961000  | 4.213781000  | -1.174950000 |
| 8  | 0.109756000  | -1.422680000 | 0.897692000  |
| 6  | 0.176777000  | -1.128822000 | 2.257670000  |
| 1  | 0.727108000  | -1.946657000 | 2.763530000  |
| 1  | -0.834278000 | -1.099748000 | 2.711151000  |
| 6  | 0.893366000  | 0.198341000  | 2.491687000  |
| 1  | 0.225072000  | 1.044945000  | 2.254874000  |
| 1  | 1.199815000  | 0.286766000  | 3.549319000  |
| 8  | 2.025290000  | 0.254287000  | 1.646322000  |

|    |                               |              |              |    |                               |              |              |
|----|-------------------------------|--------------|--------------|----|-------------------------------|--------------|--------------|
| 1  | 3.906307000                   | 0.948125000  | 0.556174000  | 1  | 2.072803000                   | 1.217462000  | 1.286488000  |
|    | <b>Int<sub>4</sub></b>        |              |              |    | <b>Int<sub>5</sub></b>        |              |              |
|    | <b>E(scf)= -1205.89773431</b> |              |              |    | <b>E(scf)= -1205.89142099</b> |              |              |
| 8  | -1.820781000                  | 0.293861000  | 1.390070000  | 8  | -2.052195000                  | 0.391039000  | -1.221758000 |
| 6  | -1.341780000                  | -0.551496000 | 0.385748000  | 6  | -1.341740000                  | 0.738626000  | -0.065422000 |
| 6  | -2.569896000                  | -1.036790000 | -0.403917000 | 6  | -2.359001000                  | 0.744374000  | 1.089736000  |
| 8  | -0.422721000                  | 0.059455000  | -0.394738000 | 8  | -0.317362000                  | -0.119861000 | 0.152818000  |
| 8  | -3.221006000                  | 0.098165000  | -0.977212000 | 8  | -2.922533000                  | -0.562382000 | 1.215623000  |
| 6  | -2.437961000                  | 1.476404000  | 0.917061000  | 6  | -2.599732000                  | -0.912317000 | -1.206173000 |
| 6  | -3.119536000                  | 1.322016000  | -0.447221000 | 6  | -2.965217000                  | -1.421666000 | 0.192378000  |
| 8  | -3.596521000                  | 2.266324000  | -1.008302000 | 8  | -3.338559000                  | -2.547306000 | 0.360452000  |
| 6  | -1.484344000                  | 2.665811000  | 0.927940000  | 6  | -1.722725000                  | -1.911735000 | -1.951726000 |
| 1  | -3.264301000                  | 1.672738000  | 1.622768000  | 1  | -3.568248000                  | -0.825943000 | -1.730299000 |
| 1  | -0.661824000                  | 2.497447000  | 0.216621000  | 1  | -0.755448000                  | -2.020366000 | -1.438523000 |
| 1  | -1.065845000                  | 2.788829000  | 1.940435000  | 1  | -1.549600000                  | -1.546434000 | -2.977635000 |
| 1  | -2.026802000                  | 3.581996000  | 0.648381000  | 1  | -2.224273000                  | -2.890556000 | -1.997644000 |
| 6  | -2.266169000                  | -1.998590000 | -1.530543000 | 6  | -1.790200000                  | 1.121603000  | 2.439119000  |
| 1  | -3.256542000                  | -1.502268000 | 0.323156000  | 1  | -3.161267000                  | 1.444871000  | 0.803436000  |
| 1  | -1.605581000                  | -1.518965000 | -2.271612000 | 1  | -1.030610000                  | 0.385300000  | 2.751051000  |
| 1  | -3.199950000                  | -2.285435000 | -2.039912000 | 1  | -2.589548000                  | 1.123999000  | 3.197241000  |
| 1  | -1.785247000                  | -2.907598000 | -1.134319000 | 1  | -1.340928000                  | 2.126800000  | 2.392801000  |
| 50 | 1.277620000                   | -1.083936000 | -0.777169000 | 50 | 1.514675000                   | 0.568377000  | 0.836665000  |
| 8  | 3.021206000                   | 1.395926000  | 0.911827000  | 8  | 1.964282000                   | -1.720655000 | 1.089780000  |
| 6  | 2.819675000                   | 1.620556000  | -0.290443000 | 6  | 2.499184000                   | -1.769926000 | -0.039398000 |
| 6  | 3.151921000                   | 2.968054000  | -0.878839000 | 6  | 3.014737000                   | -3.063716000 | -0.602932000 |
| 8  | 2.320470000                   | 0.767315000  | -1.111276000 | 8  | 2.587720000                   | -0.705107000 | -0.735598000 |
| 1  | 2.206949000                   | 3.499880000  | -1.085138000 | 1  | 3.976993000                   | -2.900827000 | -1.112030000 |
| 1  | 3.675255000                   | 2.843020000  | -1.839539000 | 1  | 2.292275000                   | -3.426559000 | -1.354200000 |
| 1  | 3.758146000                   | 3.558901000  | -0.178149000 | 1  | 3.113411000                   | -3.818091000 | 0.189795000  |
| 8  | -0.773721000                  | -1.686195000 | 1.014004000  | 8  | -0.894336000                  | 2.060145000  | -0.220685000 |
| 6  | -0.214039000                  | -1.544864000 | 2.308486000  | 6  | -0.562923000                  | 2.516233000  | -1.515872000 |
| 1  | 0.179415000                   | -2.545597000 | 2.545904000  | 1  | -0.193561000                  | 3.542374000  | -1.363199000 |
| 1  | -0.994282000                  | -1.284696000 | 3.041847000  | 1  | -1.460416000                  | 2.553536000  | -2.155863000 |
| 6  | 0.897679000                   | -0.514470000 | 2.388226000  | 6  | 0.496595000                   | 1.693652000  | -2.224425000 |
| 1  | 0.488935000                   | 0.497849000  | 2.244209000  | 1  | 0.124783000                   | 0.672365000  | -2.403913000 |
| 1  | 1.358133000                   | -0.574678000 | 3.390196000  | 1  | 0.712664000                   | 2.174266000  | -3.196663000 |
| 8  | 1.895494000                   | -0.775606000 | 1.408367000  | 8  | 1.678923000                   | 1.657354000  | -1.435621000 |
| 1  | 2.479886000                   | 0.081626000  | 1.312664000  | 1  | 2.258670000                   | 0.949843000  | -1.769407000 |
|    | <b>Int<sub>6</sub></b>        |              |              |    | <b>Int<sub>7</sub></b>        |              |              |
|    | <b>E(scf)= -1205.87700229</b> |              |              |    | <b>E(scf)= -1205.87489056</b> |              |              |
| 8  | 1.199612000                   | 0.286800000  | 1.143650000  | 8  | -2.116750000                  | 0.287326000  | -0.277153000 |
| 6  | 1.047066000                   | 0.447806000  | -0.236270000 | 6  | -0.906895000                  | -0.092696000 | 0.314326000  |
| 6  | 2.435649000                   | 0.746134000  | -0.825505000 | 6  | -1.222688000                  | -0.981349000 | 1.530183000  |
| 8  | 0.464311000                   | -0.600819000 | -0.837488000 | 8  | -0.045683000                  | -0.675019000 | -0.531214000 |
| 8  | 3.311085000                   | -0.341781000 | -0.521564000 | 8  | -2.036820000                  | -2.086338000 | 1.129220000  |
| 6  | 2.005754000                   | -0.811148000 | 1.521640000  | 6  | -2.911818000                  | -0.773601000 | -0.770106000 |
| 6  | 3.097764000                   | -1.169604000 | 0.507589000  | 6  | -2.798490000                  | -2.072560000 | 0.032247000  |
| 8  | 3.786517000                   | -2.137213000 | 0.658950000  | 8  | -3.405231000                  | -3.051490000 | -0.296838000 |
| 6  | 1.162893000                   | -2.025633000 | 1.892698000  | 6  | -2.674001000                  | -1.025080000 | -2.255820000 |
| 1  | 2.560124000                   | -0.474123000 | 2.415439000  | 1  | -3.955304000                  | -0.444646000 | -0.625606000 |
| 1  | 0.591140000                   | -2.375363000 | 1.019178000  | 1  | -1.649997000                  | -1.391641000 | -2.422799000 |
| 1  | 0.461848000                   | -1.736362000 | 2.692845000  | 1  | -2.812599000                  | -0.080674000 | -2.807014000 |
| 1  | 1.810717000                   | -2.838547000 | 2.254836000  | 1  | -3.392315000                  | -1.771486000 | -2.628089000 |
| 6  | 2.434676000                   | 0.928180000  | -2.326711000 | 6  | 0.012007000                   | -1.548205000 | 2.194689000  |
| 1  | 2.834927000                   | 1.647227000  | -0.327946000 | 1  | -1.811205000                  | -0.382656000 | 2.246846000  |
| 1  | 2.043148000                   | 0.019156000  | -2.809138000 | 1  | 0.542231000                   | -2.192800000 | 1.476184000  |
| 1  | 3.460370000                   | 1.109961000  | -2.685283000 | 1  | -0.274928000                  | -2.146728000 | 3.074330000  |
| 1  | 1.802831000                   | 1.788218000  | -2.602379000 | 1  | 0.686229000                   | -0.735068000 | 2.506149000  |
| 50 | -1.499750000                  | -0.139941000 | -1.349778000 | 50 | 1.516361000                   | 0.637478000  | -0.977125000 |

|   |              |              |              |   |              |              |              |
|---|--------------|--------------|--------------|---|--------------|--------------|--------------|
| 8 | -2.090936000 | -2.077746000 | -0.265558000 | 8 | 2.628909000  | 0.116858000  | 0.898964000  |
| 6 | -2.344808000 | -1.434070000 | 0.786780000  | 6 | 3.140213000  | -0.924837000 | 0.380043000  |
| 6 | -2.779223000 | -2.149404000 | 2.032214000  | 6 | 4.005895000  | -1.820567000 | 1.216231000  |
| 8 | -2.202146000 | -0.172292000 | 0.793789000  | 8 | 2.885245000  | -1.203092000 | -0.820571000 |
| 1 | -3.394227000 | -1.491479000 | 2.662984000  | 1 | 4.627563000  | -2.464407000 | 0.578451000  |
| 1 | -1.873849000 | -2.429907000 | 2.597347000  | 1 | 3.346259000  | -2.457794000 | 1.830508000  |
| 1 | -3.320959000 | -3.070707000 | 1.773891000  | 1 | 4.626879000  | -1.220199000 | 1.897734000  |
| 8 | 0.170622000  | 1.552371000  | -0.421013000 | 8 | -0.284666000 | 1.117242000  | 0.738865000  |
| 6 | 0.248531000  | 2.694948000  | 0.419203000  | 6 | -1.036002000 | 2.169413000  | 1.320120000  |
| 1 | 0.096383000  | 3.578680000  | -0.221165000 | 1 | -0.437042000 | 2.580063000  | 2.148401000  |
| 1 | 1.245363000  | 2.765922000  | 0.880143000  | 1 | -1.984512000 | 1.787736000  | 1.727532000  |
| 6 | -0.812772000 | 2.656295000  | 1.505401000  | 6 | -1.319481000 | 3.257364000  | 0.297704000  |
| 1 | -1.810084000 | 2.534611000  | 1.035529000  | 1 | -0.357997000 | 3.573624000  | -0.161433000 |
| 1 | -0.639151000 | 1.773735000  | 2.146830000  | 1 | -1.958004000 | 2.835064000  | -0.500980000 |
| 8 | -0.705172000 | 3.869752000  | 2.205410000  | 8 | -1.941914000 | 4.309801000  | 0.984388000  |
| 1 | -1.325368000 | 3.862417000  | 2.944139000  | 1 | -2.210478000 | 4.988084000  | 0.353070000  |

**TS<sub>3</sub>**

**E(scf)= -1205.86857227**

**v<sub>min</sub>= -46.1064**

|    |              |              |              |
|----|--------------|--------------|--------------|
| 8  | -1.124477000 | 0.749118000  | -0.795911000 |
| 6  | -0.760807000 | 0.542959000  | 0.553350000  |
| 6  | -1.957837000 | 0.910207000  | 1.458286000  |
| 8  | -0.434902000 | -0.747672000 | 0.770166000  |
| 8  | -3.039440000 | 0.027248000  | 1.160813000  |
| 6  | -2.441562000 | 0.395628000  | -1.176971000 |
| 6  | -3.240884000 | -0.353068000 | -0.101300000 |
| 8  | -4.066007000 | -1.177518000 | -0.373829000 |
| 6  | -2.390840000 | -0.382832000 | -2.477940000 |
| 1  | -3.005782000 | 1.337368000  | -1.339834000 |
| 1  | -1.901355000 | -1.359091000 | -2.321603000 |
| 1  | -1.817945000 | 0.189908000  | -3.224733000 |
| 1  | -3.406000000 | -0.567973000 | -2.858924000 |
| 6  | -1.652537000 | 0.781745000  | 2.933250000  |
| 1  | -2.278275000 | 1.940863000  | 1.222062000  |
| 1  | -1.318691000 | -0.243777000 | 3.152888000  |
| 1  | -2.556790000 | 1.003703000  | 3.522523000  |
| 1  | -0.854996000 | 1.485766000  | 3.216233000  |
| 50 | 0.902817000  | -1.900580000 | -0.252506000 |
| 8  | 2.257195000  | -0.217567000 | -0.886999000 |
| 6  | 2.886036000  | -0.266333000 | 0.213329000  |
| 6  | 3.927791000  | 0.758418000  | 0.540119000  |
| 8  | 2.595767000  | -1.169025000 | 1.048162000  |
| 1  | 4.697527000  | 0.329497000  | 1.198336000  |
| 1  | 3.422279000  | 1.573769000  | 1.086513000  |
| 1  | 4.373421000  | 1.169683000  | -0.376762000 |
| 8  | 0.339701000  | 1.354695000  | 0.809951000  |
| 6  | 0.323207000  | 2.697388000  | 0.375630000  |
| 1  | 0.826257000  | 3.292627000  | 1.155954000  |
| 1  | -0.703288000 | 3.087505000  | 0.268954000  |
| 6  | 1.056881000  | 2.887661000  | -0.943144000 |
| 1  | 2.077900000  | 2.469023000  | -0.856353000 |
| 1  | 0.532279000  | 2.321691000  | -1.733797000 |
| 8  | 1.071613000  | 4.272710000  | -1.192629000 |
| 1  | 1.480328000  | 4.431883000  | -2.051621000 |

**TS<sub>4</sub>**

**E(scf)= -1205.85609641**

**v<sub>min</sub>= -169.0548**

|   |              |             |              |
|---|--------------|-------------|--------------|
| 8 | -0.717362000 | 0.070176000 | -0.886511000 |
| 6 | -0.381928000 | 0.878607000 | 0.961703000  |

**Int<sub>8</sub>**

**E(scf)= -1205.87172199**

|    |              |              |              |
|----|--------------|--------------|--------------|
| 8  | -0.859021000 | -0.336038000 | 0.629112000  |
| 6  | -0.686551000 | -0.459500000 | -0.809879000 |
| 6  | -2.067212000 | -0.654244000 | -1.471115000 |
| 8  | -0.085703000 | 0.653083000  | -1.235941000 |
| 8  | -2.968710000 | 0.354283000  | -1.008713000 |
| 6  | -2.172013000 | -0.322696000 | 1.168937000  |
| 6  | -3.100458000 | 0.539322000  | 0.306996000  |
| 8  | -3.892278000 | 1.318246000  | 0.753414000  |
| 6  | -2.098436000 | 0.163831000  | 2.599942000  |
| 1  | -2.577911000 | -1.354490000 | 1.156545000  |
| 1  | -1.735957000 | 1.204585000  | 2.637785000  |
| 1  | -1.415632000 | -0.480397000 | 3.176403000  |
| 1  | -3.097435000 | 0.137879000  | 3.059767000  |
| 6  | -1.990806000 | -0.553301000 | -2.977358000 |
| 1  | -2.472679000 | -1.640124000 | -1.181106000 |
| 1  | -1.603862000 | 0.437048000  | -3.259865000 |
| 1  | -2.990613000 | -0.698386000 | -3.416582000 |
| 1  | -1.306850000 | -1.324333000 | -3.363940000 |
| 50 | 0.818438000  | 1.698422000  | 0.314350000  |
| 8  | 2.217117000  | 0.005312000  | 0.768689000  |
| 6  | 3.004195000  | 0.333871000  | -0.172914000 |
| 6  | 4.148367000  | -0.563778000 | -0.536405000 |
| 8  | 2.783138000  | 1.392177000  | -0.818651000 |
| 1  | 4.946873000  | 0.006403000  | -1.032285000 |
| 1  | 3.762948000  | -1.317541000 | -1.245128000 |
| 1  | 4.527966000  | -1.086199000 | 0.353805000  |
| 8  | 0.135131000  | -1.553187000 | -1.061310000 |
| 6  | -0.087937000 | -2.763439000 | -0.375682000 |
| 1  | -0.038250000 | -3.583121000 | -1.112248000 |
| 1  | -1.085076000 | -2.803834000 | 0.096717000  |
| 6  | 0.968844000  | -2.983703000 | 0.693671000  |
| 1  | 1.969837000  | -2.920354000 | 0.221433000  |
| 1  | 0.905757000  | -2.170963000 | 1.439666000  |
| 8  | 0.722819000  | -4.250686000 | 1.252935000  |
| 1  | 1.361072000  | -4.410965000 | 1.958096000  |

**Int<sub>9</sub>**

**E(scf)= -1205.85775399**

|   |             |              |              |
|---|-------------|--------------|--------------|
| 8 | 0.762696000 | -0.065375000 | 1.036213000  |
| 6 | 0.234802000 | 1.045874000  | -1.041430000 |

|    |              |              |              |    |              |              |              |
|----|--------------|--------------|--------------|----|--------------|--------------|--------------|
| 6  | -1.702306000 | 1.638605000  | 0.995614000  | 6  | 1.480819000  | 1.894268000  | -0.820419000 |
| 8  | -0.259347000 | -0.202623000 | 1.571019000  | 8  | 0.281336000  | -0.016975000 | -1.646983000 |
| 8  | -2.791548000 | 0.747341000  | 0.887687000  | 8  | 2.634078000  | 1.092169000  | -0.863100000 |
| 6  | -2.014044000 | 0.190542000  | -1.378876000 | 6  | 2.088503000  | 0.171318000  | 1.379185000  |
| 6  | -3.047759000 | 0.058714000  | -0.248215000 | 6  | 3.000936000  | 0.252102000  | 0.139058000  |
| 8  | -4.036026000 | -0.612780000 | -0.309277000 | 8  | 4.008927000  | -0.377939000 | 0.005466000  |
| 6  | -2.309507000 | -0.795465000 | -2.501079000 | 6  | 2.640728000  | -0.842933000 | 2.373958000  |
| 1  | -2.138653000 | 1.217372000  | -1.790667000 | 1  | 2.144283000  | 1.174106000  | 1.859985000  |
| 1  | -2.296625000 | -1.833518000 | -2.126630000 | 1  | 2.704993000  | -1.845733000 | 1.917593000  |
| 1  | -1.543107000 | -0.684828000 | -3.285264000 | 1  | 1.965290000  | -0.885412000 | 3.243787000  |
| 1  | -3.304199000 | -0.615440000 | -2.937680000 | 1  | 3.652491000  | -0.569179000 | 2.712881000  |
| 6  | -1.840955000 | 2.362055000  | 2.327959000  | 6  | 1.604286000  | 2.924483000  | -1.939302000 |
| 1  | -1.732037000 | 2.370221000  | 0.172394000  | 1  | 1.405369000  | 2.411773000  | 0.148234000  |
| 1  | -1.804040000 | 1.632243000  | 3.151938000  | 1  | 1.685290000  | 2.412874000  | -2.911519000 |
| 1  | -2.808142000 | 2.887629000  | 2.359268000  | 1  | 2.513814000  | 3.524111000  | -1.779675000 |
| 1  | -1.028490000 | 3.095465000  | 2.457711000  | 1  | 0.729875000  | 3.595477000  | -1.954833000 |
| 50 | 0.148432000  | -1.771667000 | 0.006855000  | 50 | 0.055573000  | -1.761501000 | -0.040143000 |
| 8  | 2.000597000  | -0.810815000 | -0.700267000 | 8  | -1.870714000 | -1.020946000 | 0.620715000  |
| 6  | 2.737113000  | -1.139648000 | 0.296900000  | 6  | -2.622596000 | -1.363052000 | -0.373649000 |
| 6  | 4.149813000  | -0.625559000 | 0.340792000  | 6  | -4.079073000 | -0.984406000 | -0.294621000 |
| 8  | 2.264958000  | -1.831067000 | 1.215638000  | 8  | -2.148565000 | -1.944182000 | -1.352651000 |
| 1  | 4.769053000  | -1.258337000 | 0.992520000  | 1  | -4.672937000 | -1.605391000 | -0.980408000 |
| 1  | 4.124456000  | 0.393559000  | 0.764579000  | 1  | -4.178036000 | 0.071009000  | -0.602658000 |
| 1  | 4.576065000  | -0.567840000 | -0.671899000 | 1  | -4.450348000 | -1.077130000 | 0.737383000  |
| 8  | 0.723726000  | 1.555187000  | 0.706056000  | 8  | -0.933737000 | 1.533472000  | -0.695916000 |
| 6  | 0.766321000  | 2.577003000  | -0.280492000 | 6  | -1.087493000 | 2.437064000  | 0.397544000  |
| 1  | 0.451592000  | 3.542875000  | 0.152064000  | 1  | -0.809964000 | 3.461924000  | 0.096376000  |
| 1  | 0.111420000  | 2.304360000  | -1.121417000 | 1  | -0.460087000 | 2.094169000  | 1.234147000  |
| 6  | 2.198762000  | 2.659758000  | -0.769605000 | 6  | -2.546404000 | 2.392115000  | 0.804822000  |
| 1  | 2.867511000  | 2.836392000  | 0.097961000  | 1  | -3.176531000 | 2.598907000  | -0.084736000 |
| 1  | 2.461039000  | 1.682184000  | -1.216568000 | 1  | -2.768588000 | 1.368554000  | 1.160856000  |
| 8  | 2.244397000  | 3.714341000  | -1.694102000 | 8  | -2.705680000 | 3.364305000  | 1.803008000  |
| 1  | 3.104360000  | 3.715252000  | -2.131208000 | 1  | -3.577354000 | 3.267786000  | 2.204847000  |

Int<sub>10</sub>

E(scf)= -1205.88683317

|    |              |              |              |
|----|--------------|--------------|--------------|
| 8  | 2.436636000  | -0.896519000 | 1.289944000  |
| 6  | -3.267340000 | -0.003463000 | 0.528161000  |
| 6  | -2.122629000 | -0.864965000 | 0.006338000  |
| 8  | -3.253798000 | 0.638268000  | 1.537507000  |
| 8  | -1.102521000 | -0.808136000 | 0.997153000  |
| 6  | 1.163003000  | -0.668771000 | 1.745189000  |
| 6  | 0.155925000  | -0.848836000 | 0.616737000  |
| 8  | 0.493421000  | -1.000398000 | -0.547150000 |
| 6  | 0.976988000  | 0.727874000  | 2.359306000  |
| 1  | 0.887886000  | -1.422061000 | 2.513862000  |
| 1  | 1.143191000  | 1.497819000  | 1.587627000  |
| 1  | 1.728000000  | 0.857067000  | 3.154664000  |
| 1  | -0.033493000 | 0.852327000  | 2.782688000  |
| 6  | -2.526556000 | -2.307586000 | -0.264466000 |
| 1  | -1.743561000 | -0.405193000 | -0.921320000 |
| 1  | -2.882550000 | -2.788929000 | 0.661157000  |
| 1  | -1.659976000 | -2.866738000 | -0.651363000 |
| 1  | -3.329741000 | -2.336924000 | -1.015989000 |
| 50 | 2.945530000  | -0.731784000 | -0.690221000 |
| 8  | 2.204132000  | 1.390148000  | -0.780033000 |
| 6  | 3.306888000  | 1.894867000  | -0.386226000 |
| 6  | 3.395676000  | 3.382840000  | -0.181649000 |
| 8  | 4.282064000  | 1.152344000  | -0.138030000 |
| 1  | 4.432650000  | 3.726443000  | -0.307860000 |

|   |              |              |              |
|---|--------------|--------------|--------------|
| 1 | 3.082488000  | 3.603843000  | 0.853870000  |
| 1 | 2.717896000  | 3.911286000  | -0.867828000 |
| 8 | -4.294271000 | -0.056093000 | -0.323338000 |
| 6 | -5.451250000 | 0.702112000  | 0.014310000  |
| 1 | -5.188768000 | 1.766583000  | 0.125529000  |
| 1 | -5.864314000 | 0.351823000  | 0.974339000  |
| 6 | -6.457048000 | 0.508872000  | -1.102506000 |
| 1 | -6.011826000 | 0.864047000  | -2.054066000 |
| 1 | -6.667560000 | -0.574265000 | -1.214624000 |
| 8 | -7.599021000 | 1.238158000  | -0.745949000 |
| 1 | -8.261920000 | 1.152238000  | -1.441624000 |
